# Supplementary material
Source: PubMed Central journal article supplement (PMC2933056)
Supplement: prion0402_0087SD1.pdf [file prion0402_0087SD1.pdf]

## NCBI data base; control M/M, clone # 9

Score = 456 bits (237), Expect = 2e-123 Identities = 237/237 (100%), Gaps = 0/237 (0%)  
Strand=Plus/PlusQuery

|             |                                                              |          |
|-------------|--------------------------------------------------------------|----------|
| 10970       | TAATCCCAGCACTTTGAGAGGCCGAGGCAGGTGGATCACGAGGTCAGGAGATCGAGACCA | 11029    |
|             |                                                              |          |
| Sbjct 1     | TAATCCCAGCACTTTGAGAGGCCGAGGCAGGTGGATCACGAGGTCAGGAGATCGAGACCA | 60Query  |
| 11030       | TCCTGGCTAACATGGTGAAACCCCGTCTCTACTAAAAACACAAAAAATTAGCCGGGTGTG | 11089    |
|             |                                                              |          |
| Sbjct 61    | TCCTGGCTAACATGGTGAAACCCCGTCTCTACTAAAAACACAAAAAATTAGCCGGGTGTG | 120Query |
| 11090       | GTGGCGGGCGCCTGTAGTCCCTGCTACTCGGGAGGCTGAGGCAGGAGAATGGCATGAACC | 11149    |
|             |                                                              |          |
| Sbjct 121   | GTGGCGGGCGCCTGTAGTCCCTGCTACTCGGGAGGCTGAGGCAGGAGAATGGCATGAACC | 180      |
| Query 11150 | CGGGAGGTGGAGCTGGCAGTGAGCTGAGATCACACCACTGCAGTCCAGCCTGGGTGG    | 11206    |
|             |                                                              |          |
| Sbjct 181   | CGGGAGGTGGAGCTGGCAGTGAGCTGAGATCACACCACTGCAGTCCAGCCTGGGTGG    | 237      |

Fig. 1 supplement.

| ACTIONS                         | QUERY   | SCORE | START | END | QSIZE | IDENTITY | CHRO | STRAND | START     | END       | SPAN  |
|---------------------------------|---------|-------|-------|-----|-------|----------|------|--------|-----------|-----------|-------|
| <a href="#">browser details</a> | YourSeq | 234   | 1     | 234 | 234   | 100.0%   | 5    | -      | 108769681 | 108769914 | 234   |
| <a href="#">browser details</a> | YourSeq | 199   | 1     | 234 | 234   | 92.8%    | 12   | -      | 55380352  | 55380588  | 237   |
| <a href="#">browser details</a> | YourSeq | 199   | 1     | 234 | 234   | 92.8%    | 11   | +      | 67102873  | 67103109  | 237   |
| <a href="#">browser details</a> | YourSeq | 196   | 1     | 234 | 234   | 92.7%    | 16   | -      | 80305438  | 80305673  | 236   |
| <a href="#">browser details</a> | YourSeq | 195   | 1     | 234 | 234   | 91.9%    | 18   | +      | 65009054  | 65009289  | 236   |
| <a href="#">browser details</a> | YourSeq | 195   | 1     | 234 | 234   | 92.3%    | 17   | +      | 58979102  | 59023479  | 44378 |
| <a href="#">browser details</a> | YourSeq | 195   | 1     | 234 | 234   | 91.9%    | 17   | +      | 34251949  | 34252185  | 237   |
| <a href="#">browser details</a> | YourSeq | 194   | 1     | 229 | 234   | 93.1%    | 10   | +      | 59626811  | 59627392  | 582   |
| <a href="#">browser details</a> | YourSeq | 193   | 1     | 234 | 234   | 91.5%    | 20   | -      | 61042184  | 61042420  | 237   |
| <a href="#">browser details</a> | YourSeq | 193   | 1     | 234 | 234   | 91.5%    | 14   | -      | 64697797  | 64698033  | 237   |
| <a href="#">browser details</a> | YourSeq | 193   | 1     | 234 | 234   | 91.5%    | 6    | +      | 157124270 | 157124506 | 237   |
| <a href="#">browser details</a> | YourSeq | 193   | 1     | 234 | 234   | 93.0%    | 6    | +      | 75906836  | 75907072  | 237   |

Fig. 2 supplement.

| ACTIONS QUERY                           | SCORE | START | END | QSIZE | IDENTITY | CHRO | STRAND | START     | END       | SPAN |
|-----------------------------------------|-------|-------|-----|-------|----------|------|--------|-----------|-----------|------|
| <a href="#">browser details</a> YourSeq | 237   | 1     | 237 | 237   | 100.0%   | 8    | -      | 142008284 | 142008520 | 237  |
| <a href="#">browser details</a> YourSeq | 237   | 1     | 237 | 237   | 100.0%   | 8    | -      | 63092748  | 63092984  | 237  |
| <a href="#">browser details</a> YourSeq | 237   | 1     | 237 | 237   | 100.0%   | 6    | -      | 47454630  | 47454866  | 237  |
| <a href="#">browser details</a> YourSeq | 237   | 1     | 237 | 237   | 100.0%   | 3    | -      | 194223385 | 194223621 | 237  |
| <a href="#">browser details</a> YourSeq | 237   | 1     | 237 | 237   | 100.0%   | 3    | -      | 119153906 | 119154142 | 237  |
| <a href="#">browser details</a> YourSeq | 237   | 1     | 237 | 237   | 100.0%   | 3    | -      | 101268103 | 101268339 | 237  |
| <a href="#">browser details</a> YourSeq | 237   | 1     | 237 | 237   | 100.0%   | 2    | -      | 179496114 | 179496350 | 237  |
| <a href="#">browser details</a> YourSeq | 237   | 1     | 237 | 237   | 100.0%   | 2    | -      | 38468039  | 38468275  | 237  |
| <a href="#">browser details</a> YourSeq | 237   | 1     | 237 | 237   | 100.0%   | 13   | -      | 58555819  | 58556055  | 237  |
| <a href="#">browser details</a> YourSeq | 237   | 1     | 237 | 237   | 100.0%   | 13   | -      | 56145920  | 56146156  | 237  |
| <a href="#">browser details</a> YourSeq | 237   | 1     | 237 | 237   | 100.0%   | 11   | -      | 124418361 | 124418597 | 237  |
| <a href="#">browser details</a> YourSeq | 237   | 1     | 237 | 237   | 100.0%   | 10   | -      | 132748550 | 132748786 | 237  |
| <a href="#">browser details</a> YourSeq | 237   | 1     | 237 | 237   | 100.0%   | 10   | -      | 54677732  | 54677968  | 237  |
| <a href="#">browser details</a> YourSeq | 237   | 1     | 237 | 237   | 100.0%   | 1    | -      | 105706004 | 105706240 | 237  |
| <a href="#">browser details</a> YourSeq | 237   | 1     | 237 | 237   | 100.0%   | 9    | +      | 108063976 | 108064212 | 237  |
| <a href="#">browser details</a> YourSeq | 237   | 1     | 237 | 237   | 100.0%   | 8    | +      | 72713998  | 72714234  | 237  |
| <a href="#">browser details</a> YourSeq | 237   | 1     | 237 | 237   | 100.0%   | 7    | +      | 86453425  | 86453661  | 237  |
| <a href="#">browser details</a> YourSeq | 237   | 1     | 237 | 237   | 100.0%   | 6    | +      | 17580288  | 17580524  | 237  |
| <a href="#">browser details</a> YourSeq | 237   | 1     | 237 | 237   | 100.0%   | 5    | +      | 172822360 | 172822596 | 237  |
| <a href="#">browser details</a> YourSeq | 237   | 1     | 237 | 237   | 100.0%   | 5    | +      | 121322642 | 121322878 | 237  |
| <a href="#">browser details</a> YourSeq | 237   | 1     | 237 | 237   | 100.0%   | 5    | +      | 94135413  | 94135649  | 237  |
| <a href="#">browser details</a> YourSeq | 237   | 1     | 237 | 237   | 100.0%   | 4    | +      | 177409451 | 177409687 | 237  |
| <a href="#">browser details</a> YourSeq | 237   | 1     | 237 | 237   | 100.0%   | 4    | +      | 135304612 | 135304848 | 237  |
| <a href="#">browser details</a> YourSeq | 237   | 1     | 237 | 237   | 100.0%   | 3    | +      | 120056392 | 120056628 | 237  |
| <a href="#">browser details</a> YourSeq | 237   | 1     | 237 | 237   | 100.0%   | 2    | +      | 233303596 | 233303832 | 237  |
| <a href="#">browser details</a> YourSeq | 237   | 1     | 237 | 237   | 100.0%   | 2    | +      | 81556351  | 81556587  | 237  |
| <a href="#">browser details</a> YourSeq | 237   | 1     | 237 | 237   | 100.0%   | 19   | +      | 33811653  | 33811889  | 237  |
| <a href="#">browser details</a> YourSeq | 237   | 1     | 237 | 237   | 100.0%   | 15   | +      | 81072366  | 81072602  | 237  |
| <a href="#">browser details</a> YourSeq | 237   | 1     | 237 | 237   | 100.0%   | 13   | +      | 45617789  | 45618025  | 237  |
| <a href="#">browser details</a> YourSeq | 237   | 1     | 237 | 237   | 100.0%   | 11   | +      | 6228494   | 6228730   | 237  |
| <a href="#">browser details</a> YourSeq | 237   | 1     | 237 | 237   | 100.0%   | 10   | +      | 4624837   | 4625073   | 237  |

Fig. 3 supplement.

control M/V, clone # 2  
NCBI database  
intergenic

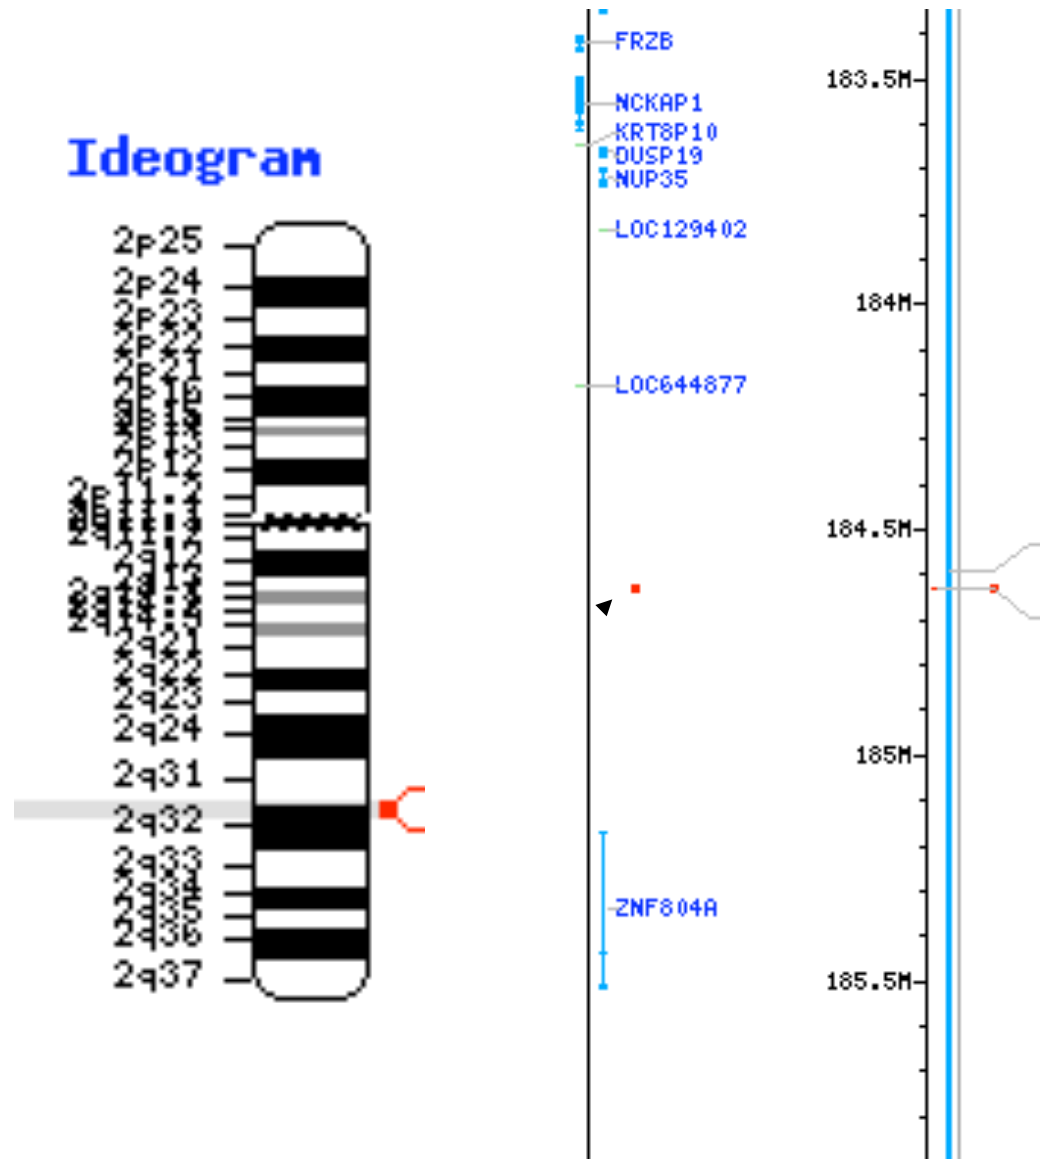

Fig. 4 supplement.
